# Supplementary material
Source: PubMed Central journal article supplement (PMC9345976)

**Western blots related to Figure 2C**

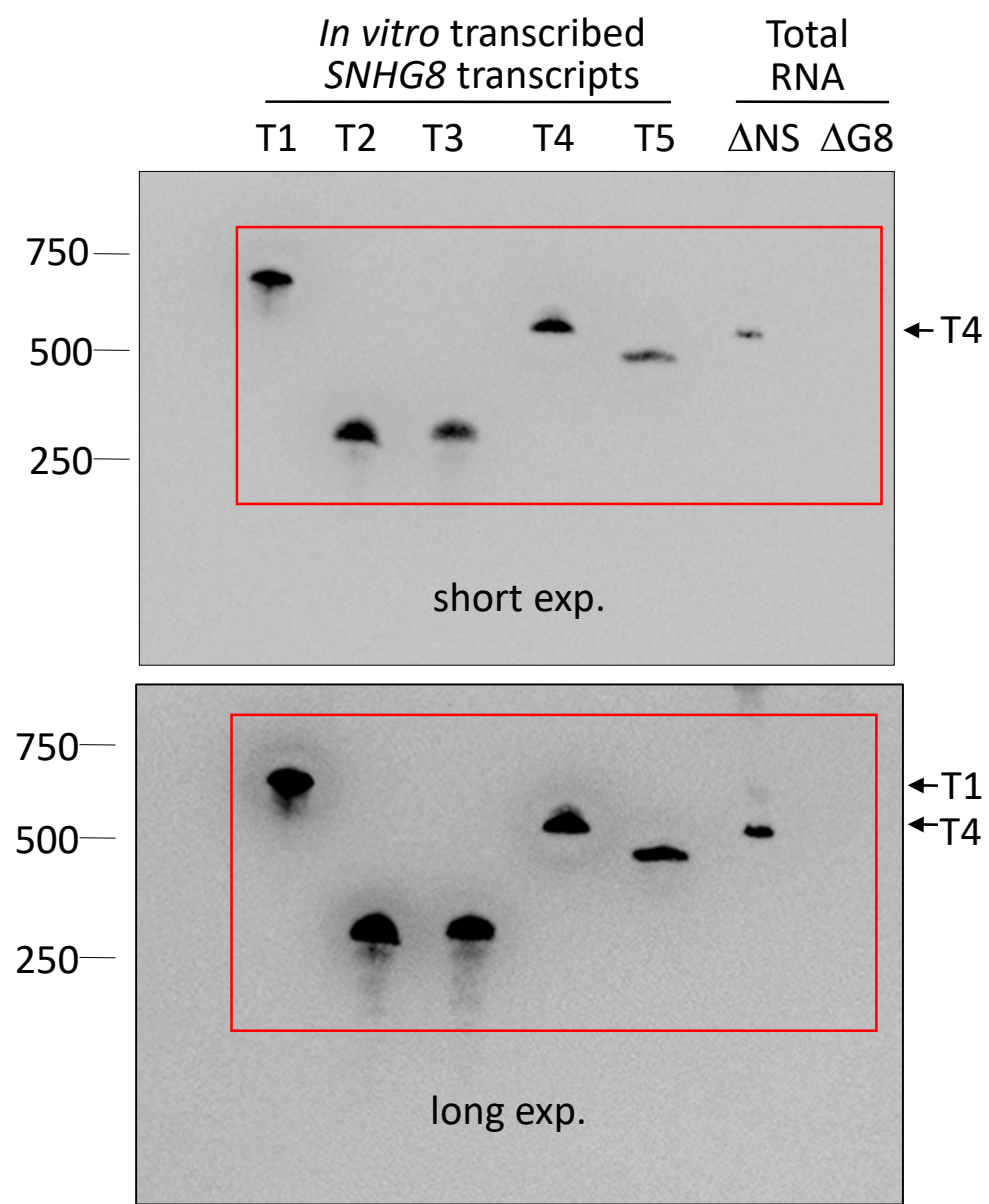

**Western blots related to Figure 2D**

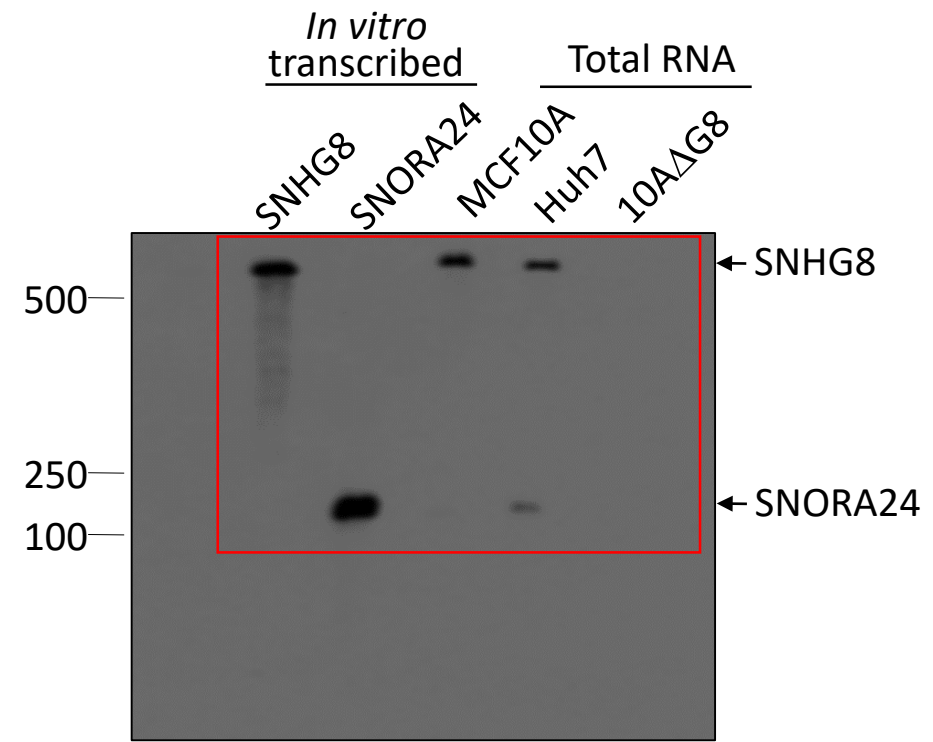

**Western blots related to Figure S2B**

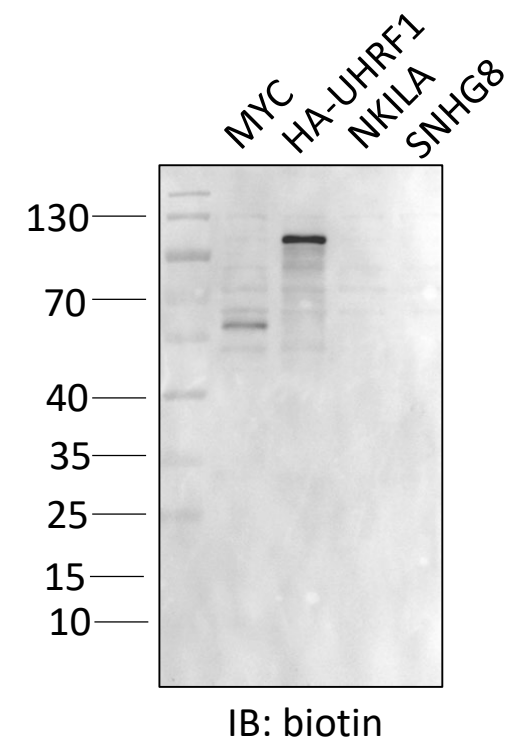

**Western blots related to Figure 2G**

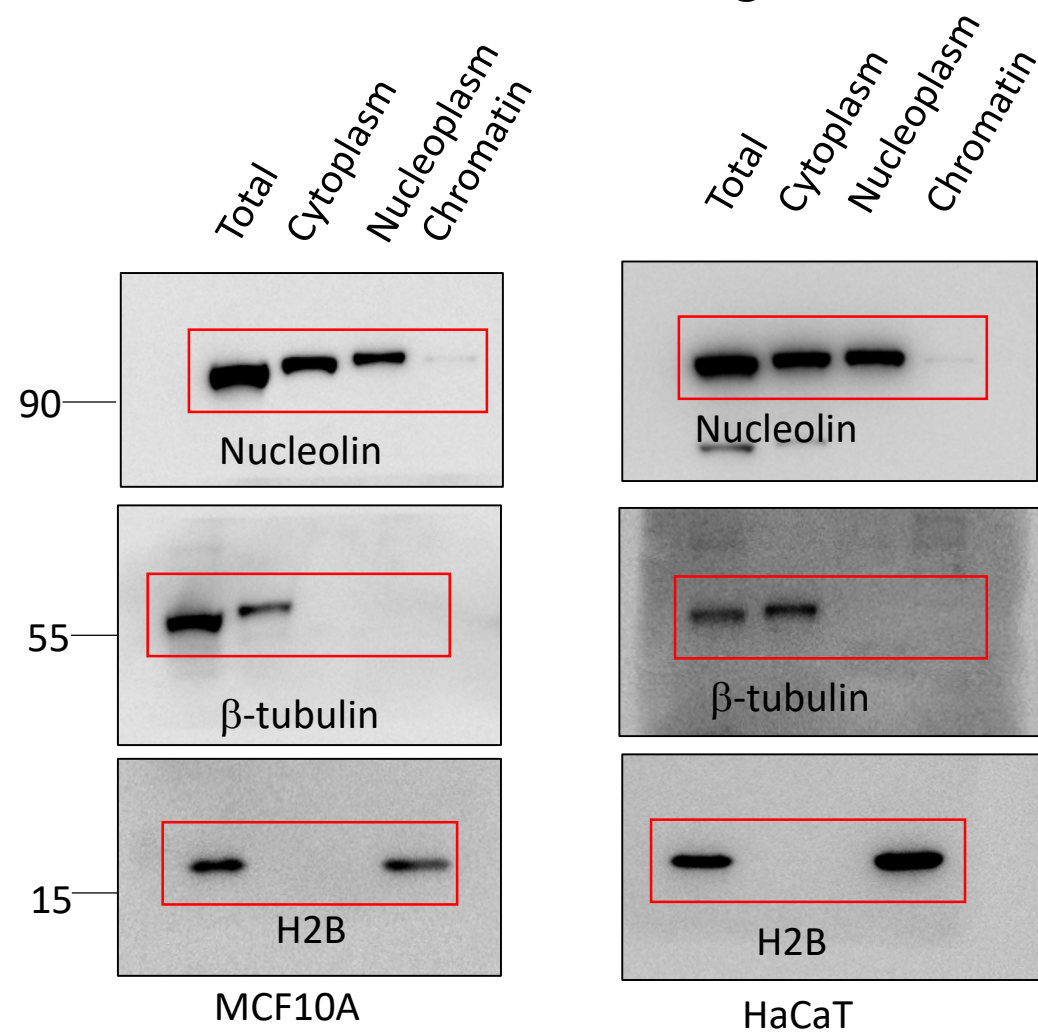

**Western blots related to Figure 3B**

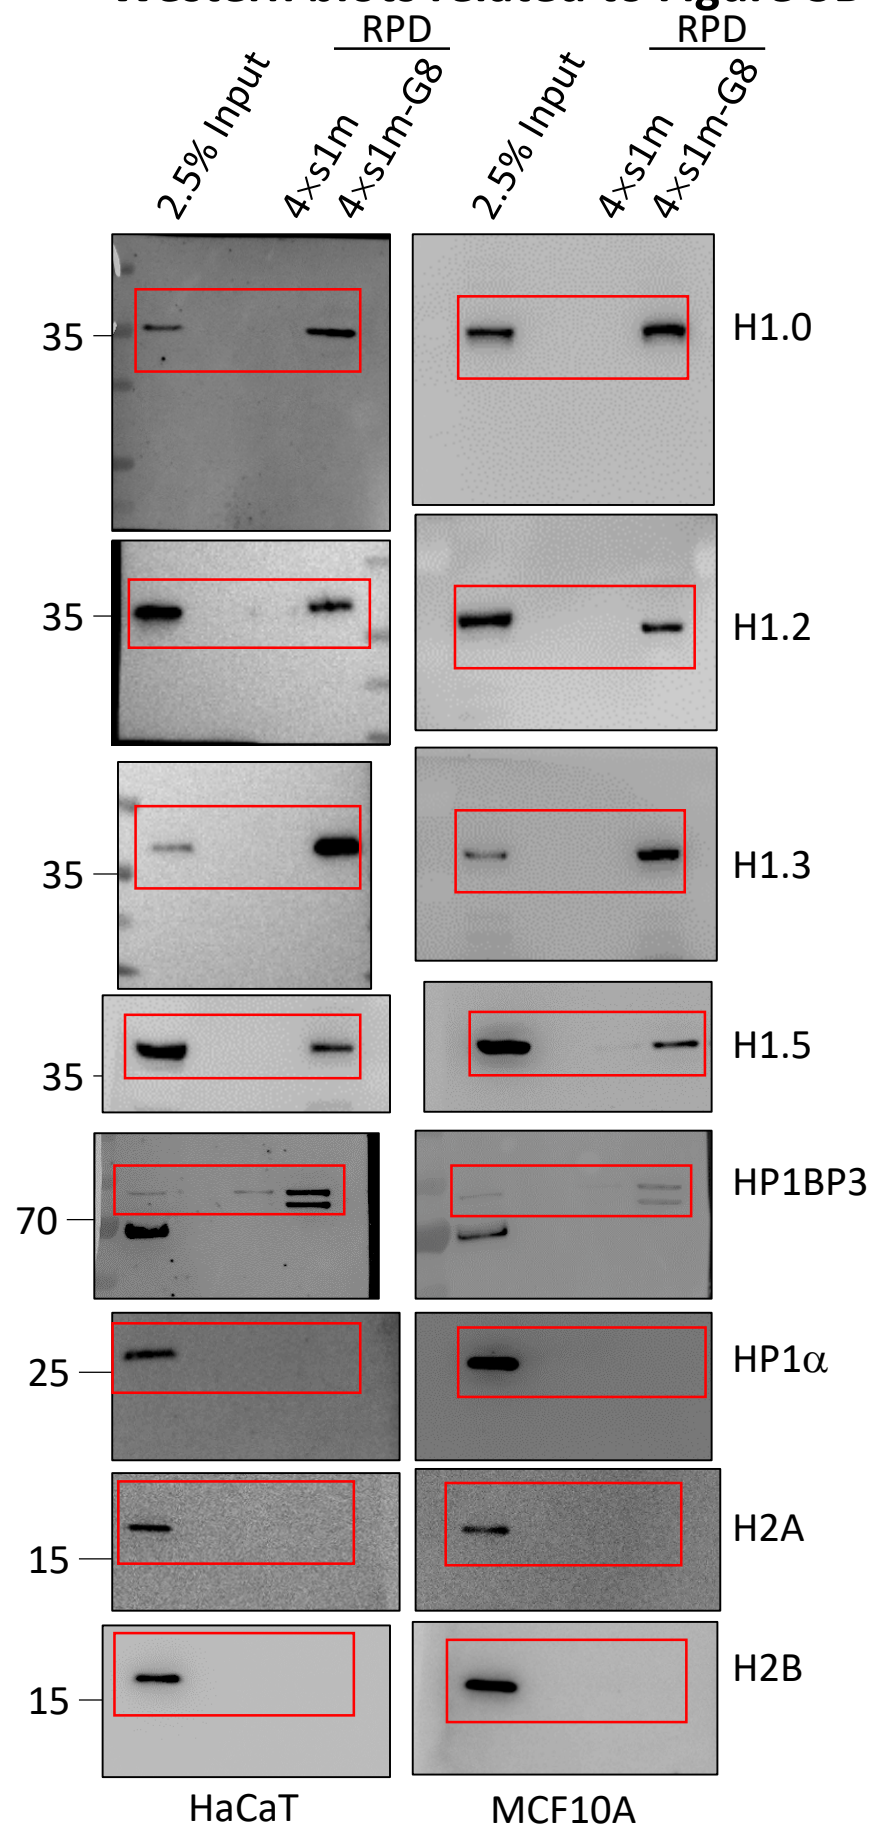

**Western blots related to Figure 3C**

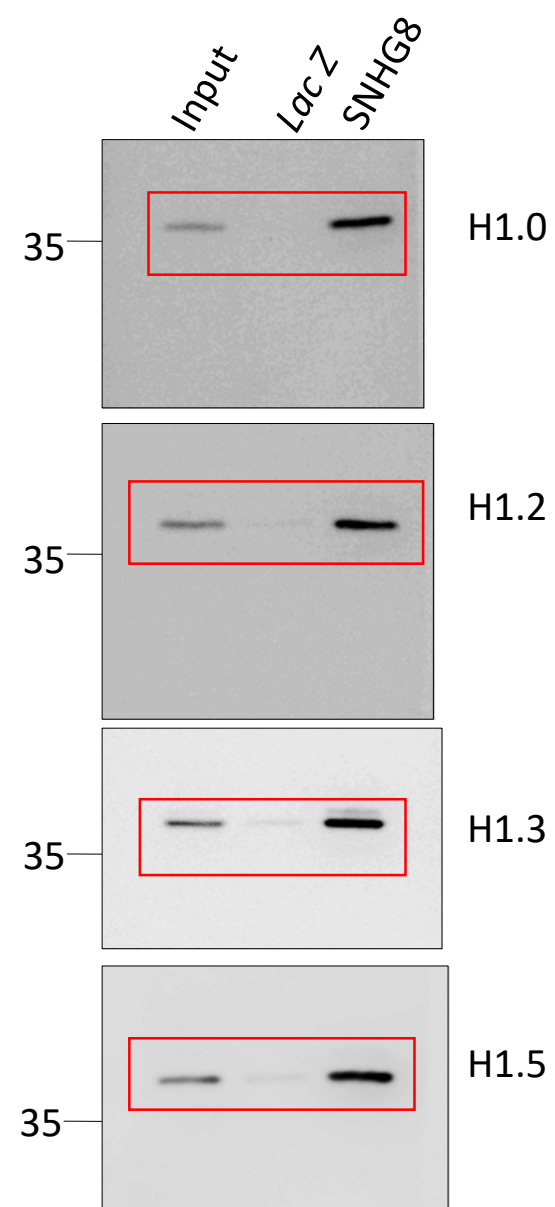

**Western blots related to Figure 3D**

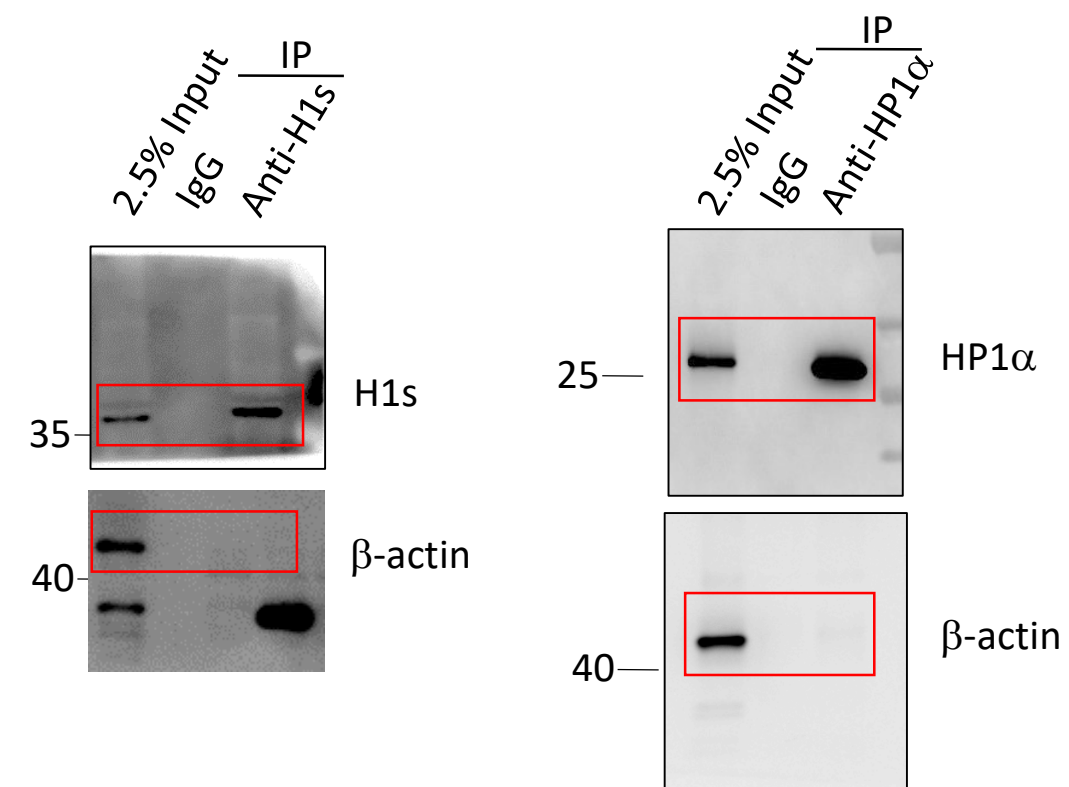

**Western blots related to Figure 3H**

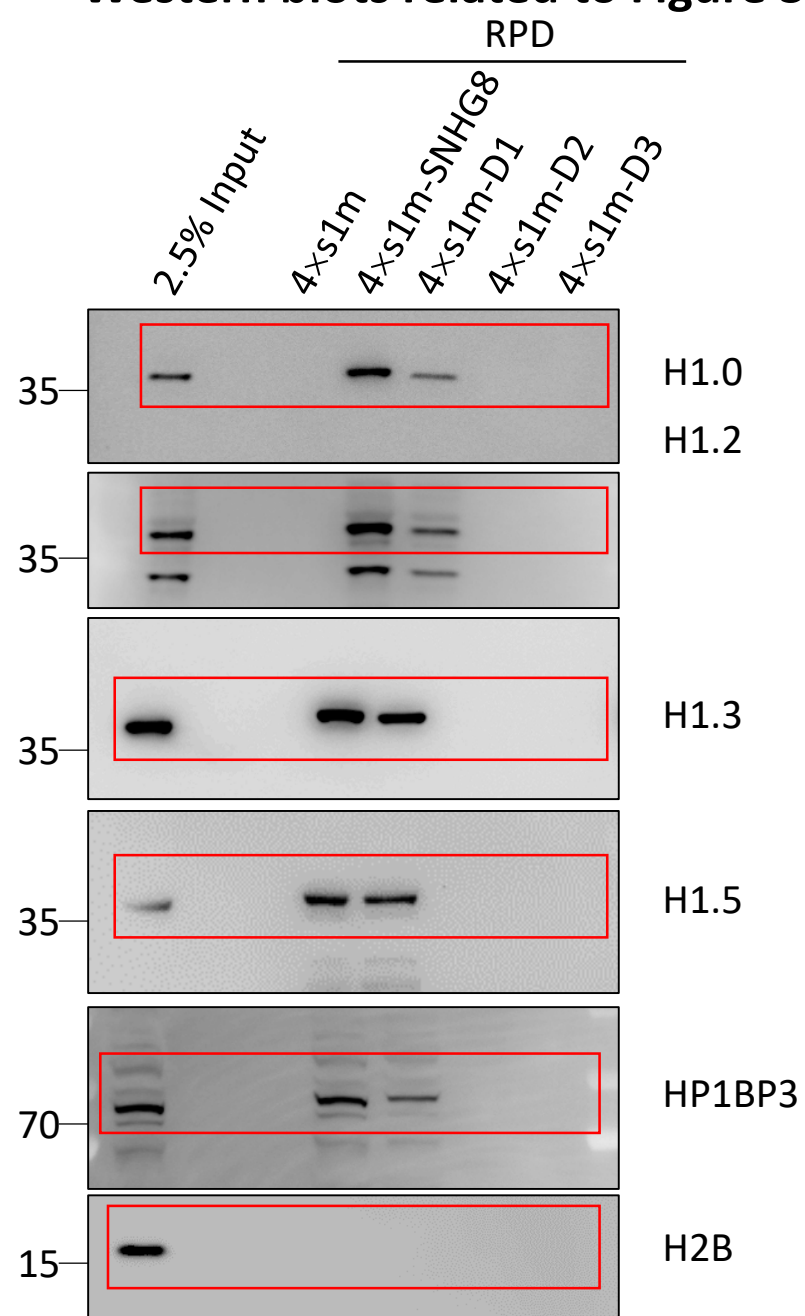

**Western blots related to Figure 3F**

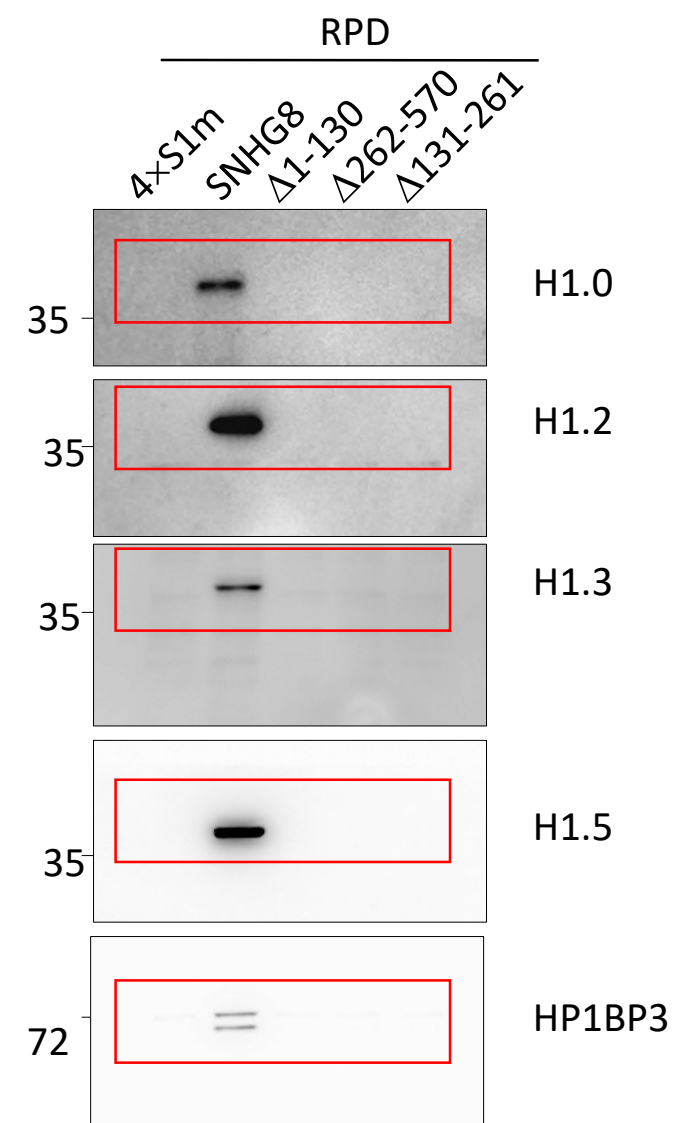

### Western blots related to Figure S3

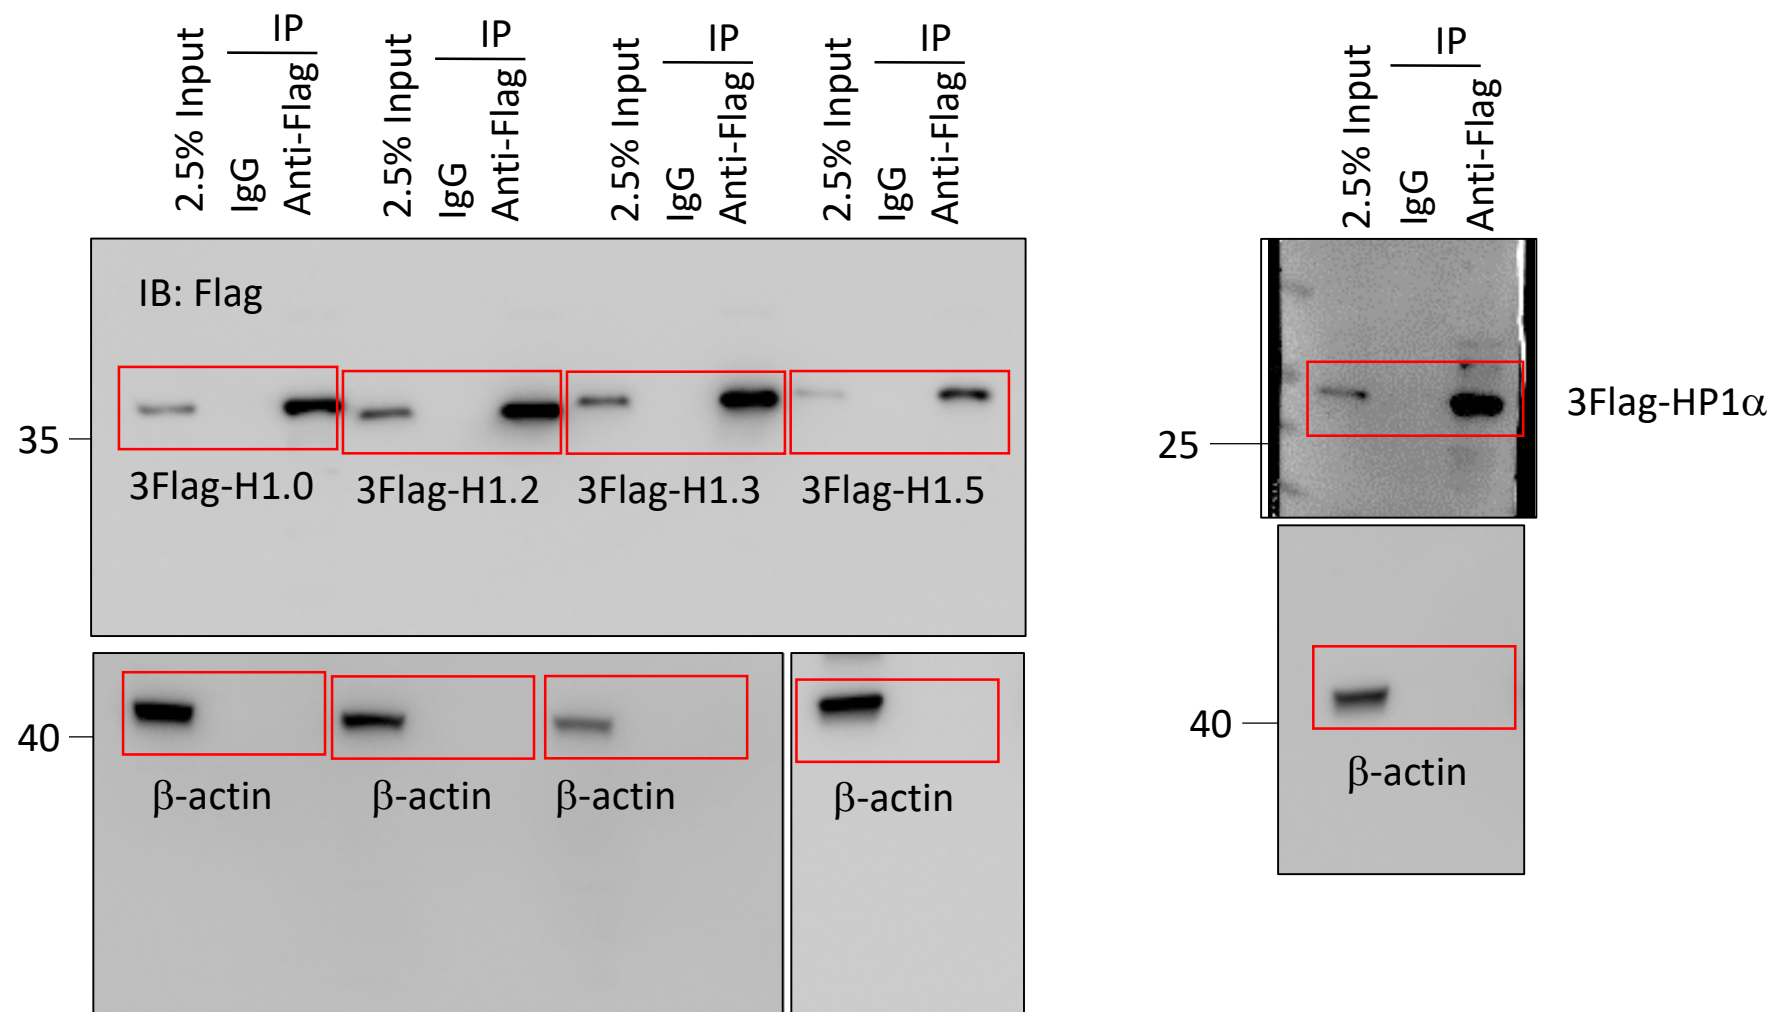



**Western blots related to Figure 4F and S4G**

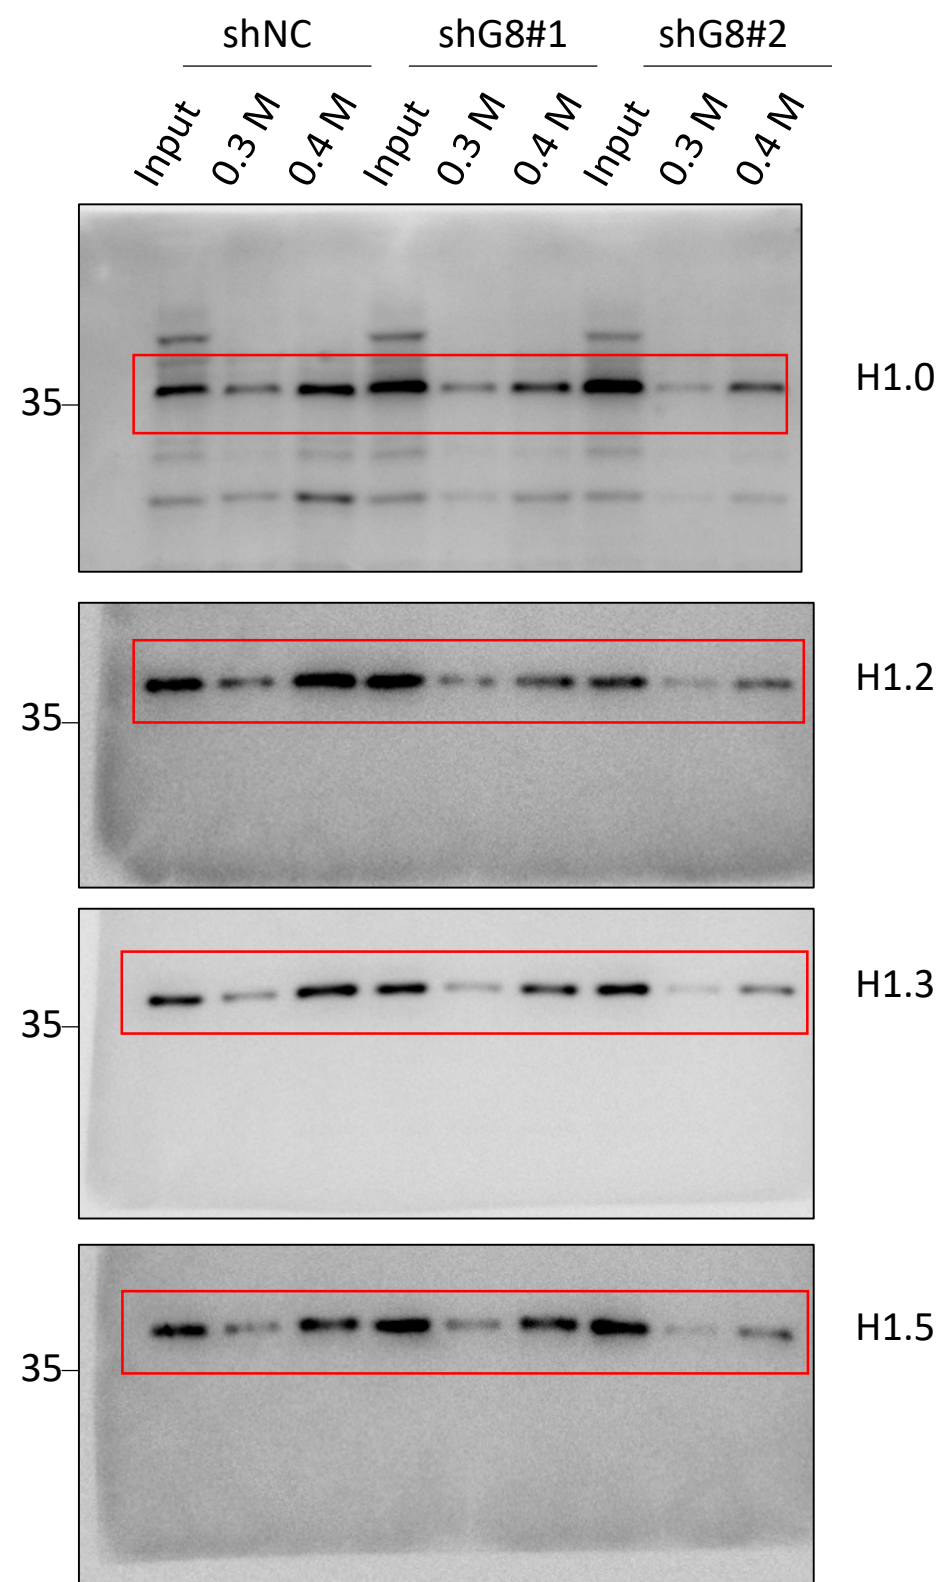

### Western blots related to Figure 6B

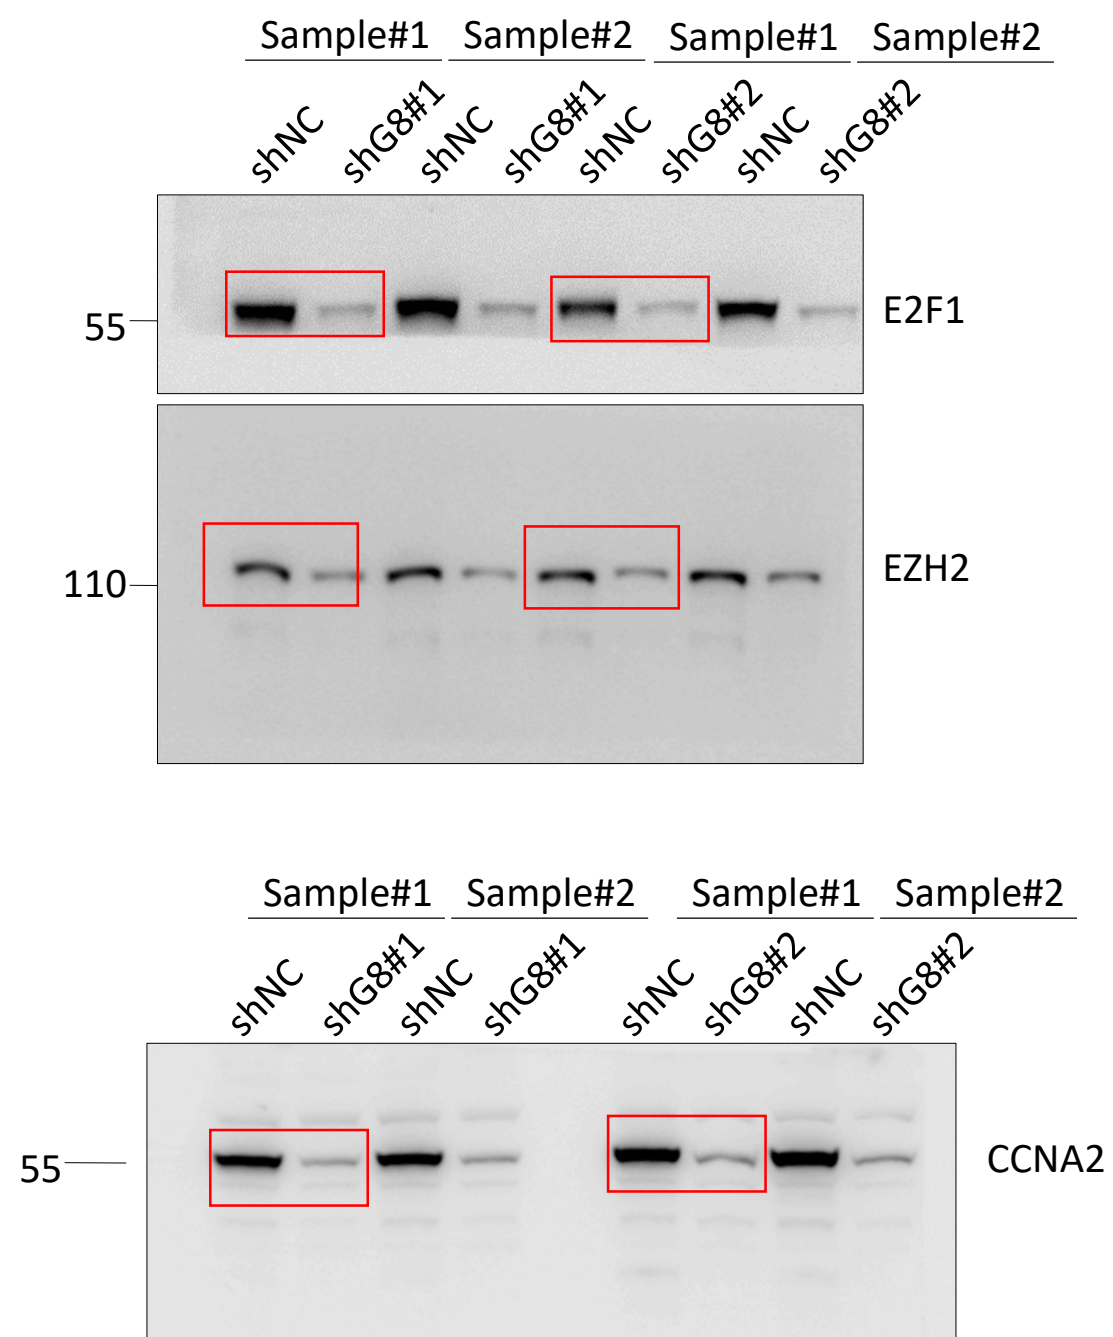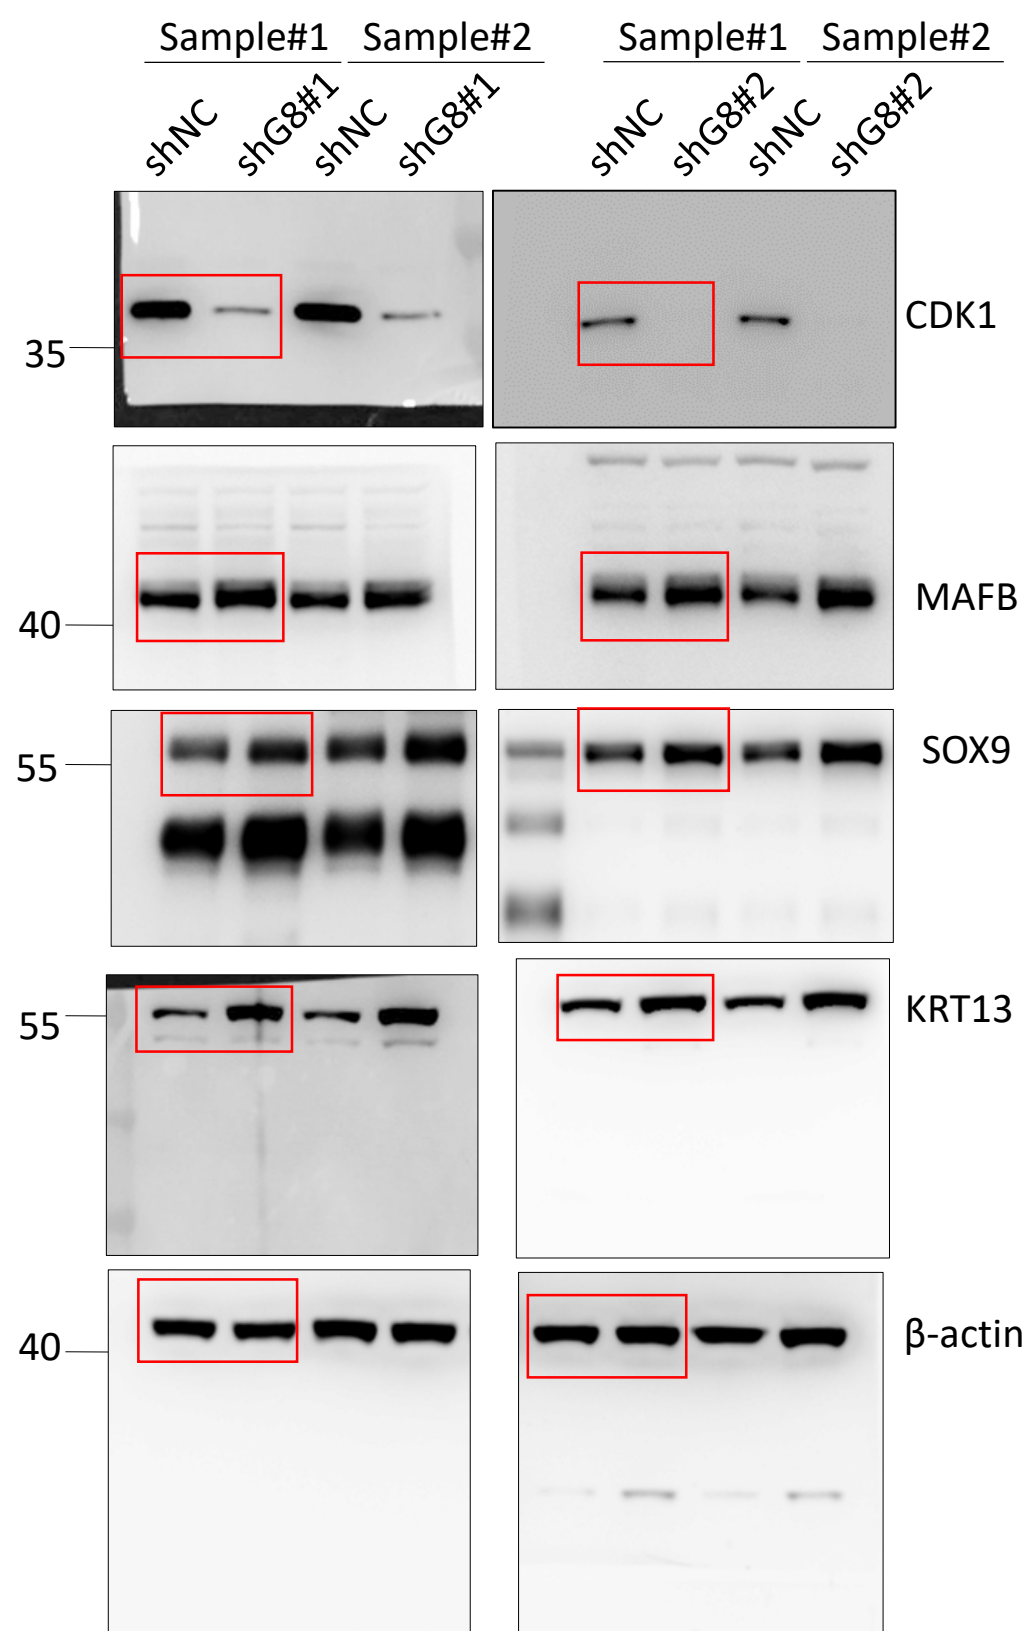

### Western blots related to Figure 6H

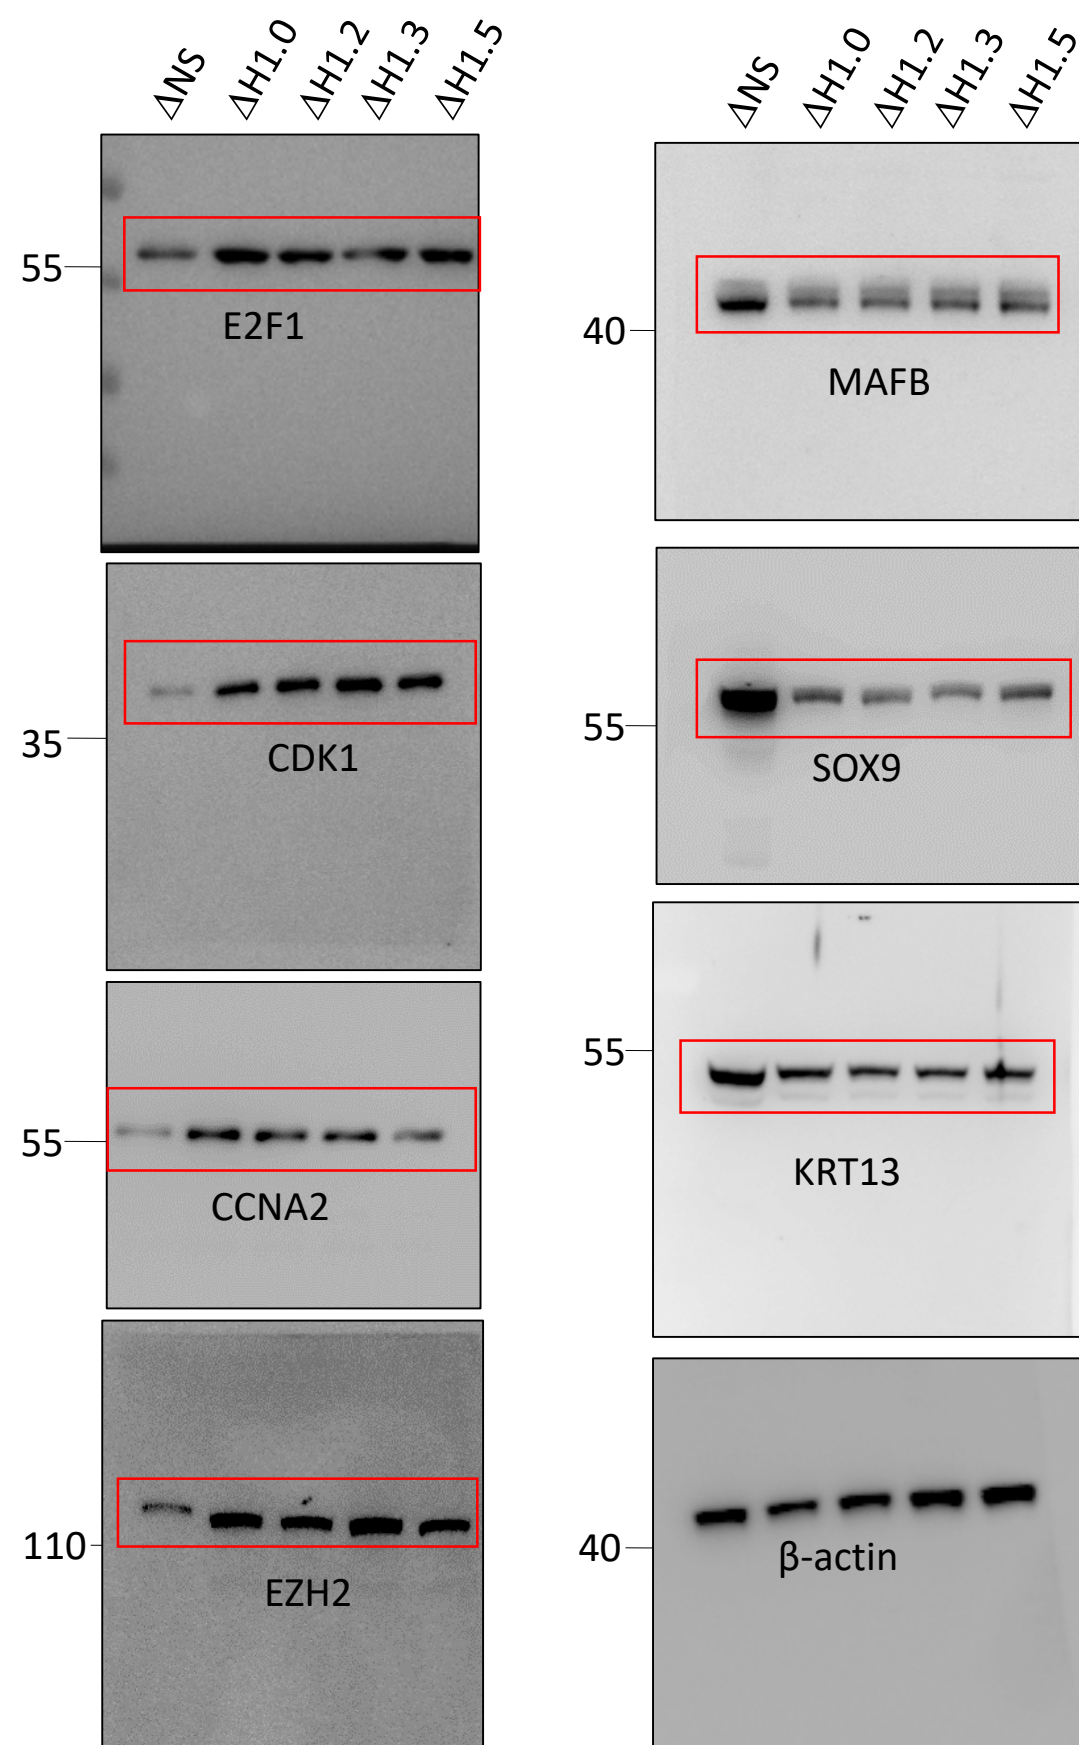

### Western blots related to Figure S6H

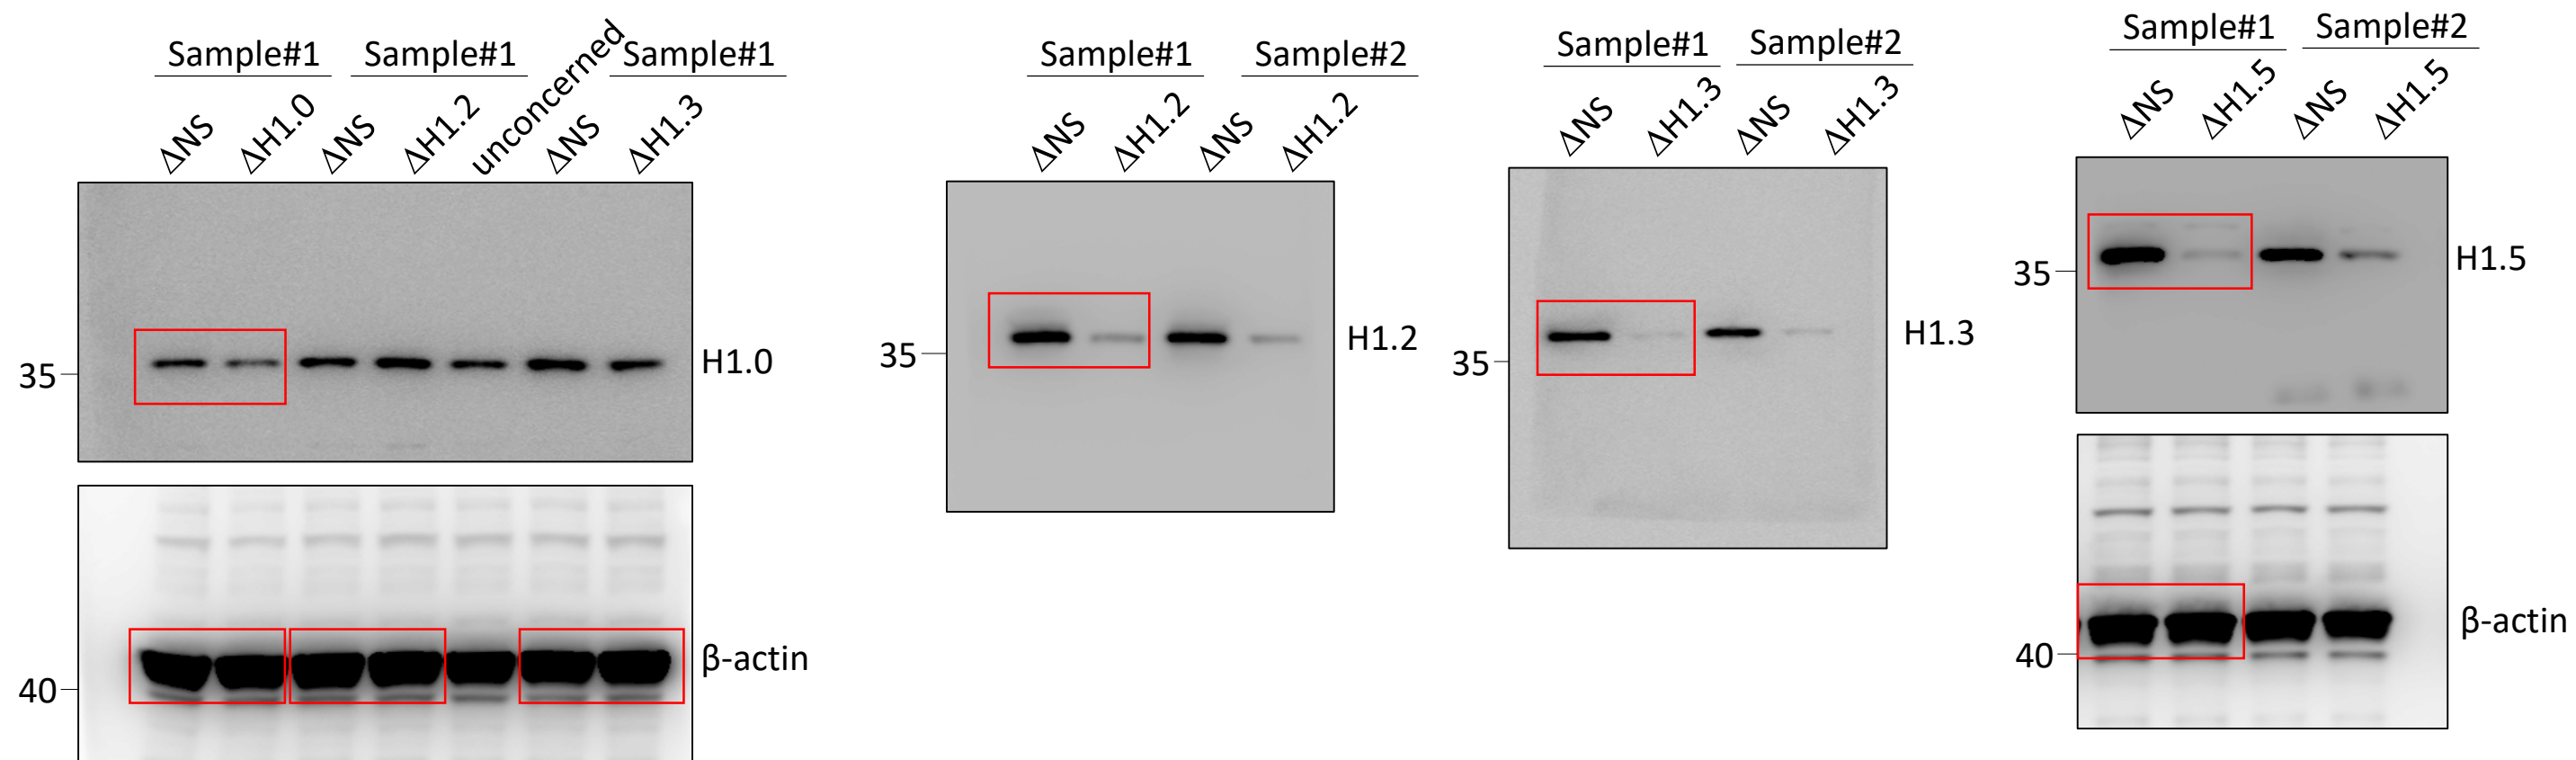

### Western blots related to Figure S6I

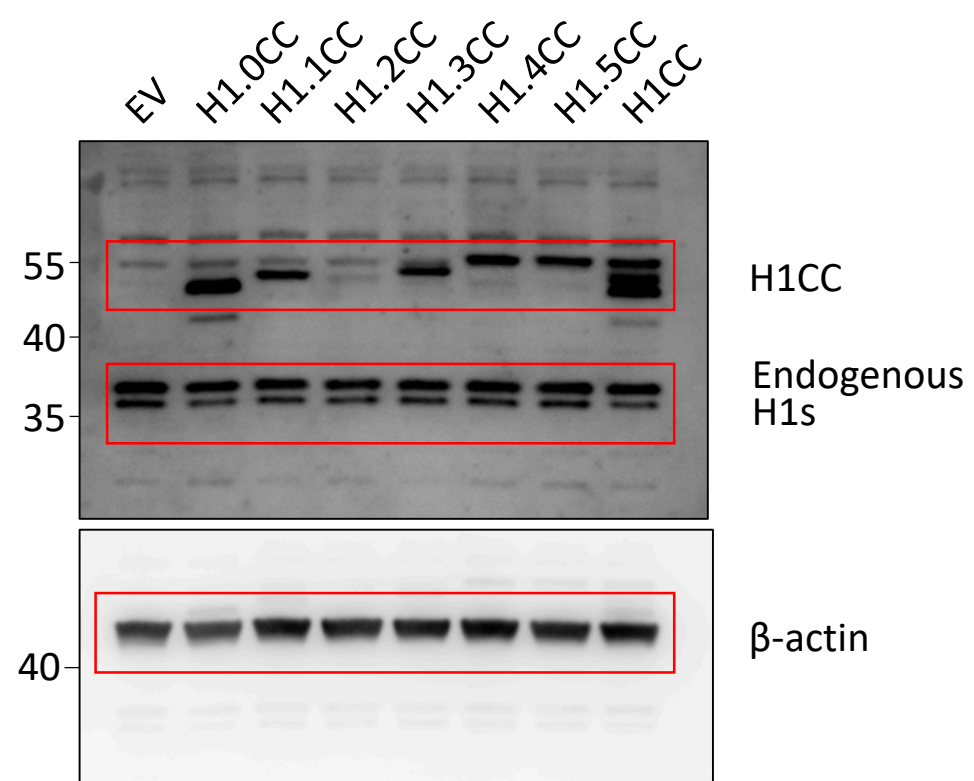

Supplement: 41418_2022_944_MOESM19_ESM.pdf [file 41418_2022_944_MOESM19_ESM.pdf]
