# Supplementary material
Source: PubMed Central journal article supplement (PMC9345976)
Supplement: 41418_2022_944_MOESM17_ESM.pdf [file 41418_2022_944_MOESM17_ESM.pdf]

**Table S1. All primers used in this study**

## A. Primer sequences used in qRT-PCR analysis

|          |                         |
|----------|-------------------------|
| SNHG8-F  | CAGTTTGGTTGCTGGTTAATT   |
| SNHG8-R  | CCGGCACCTCTAGGTTTTT     |
| MAFB-F   | TCAAGTTCGACGTGAAGAAGG   |
| MAFB-R   | GTTTCATCTGCTGGTAGTTGCT  |
| SOX9-F   | GCTCTGGAGACTTCTGAACGA   |
| SOX9-R   | CCGTTCTTCACCGACTTCCT    |
| EPCAM-F  | GTGCTGGTGTGTGAACACTG    |
| EPCAM-R  | GAAGTGCAGTCCGCAAACCT    |
| KRT5-F   | GGCGAGGAATGCAGACTCAG    |
| KRT5-R   | GTAGCTTCCACTGCTACCTCC   |
| KRT8-F   | GAGCTCTCCTCACCAAGAAGCAG |
| KRT8-R   | CCTTGTAGGACTTCTGGGTCAC  |
| KRT80-F  | TGTGACCAGAGCAACCAGAG    |
| KRT80-R  | GCTGTCCCATCCTGAGGTTC    |
| KRT10-F  | ATGTCTGTTCGATACAGCTCAAG |
| KRT10-R  | CTCCACCAAGGGAGCCTTTG    |
| KRT13-F  | GATTGGTTTCCCTTCCTCAGC   |
| KRT13-R  | GGACGCCAGGCAGATTTAAG    |
| KRT14-F  | CCAGTTCTCCTCTGGATCGC    |
| KRT14-R  | TCCAGTGGGATCTGTGTCCA    |
| KRT16-F  | ATTCTTCCC GCGAGGTCTTC   |
| KRT16-R  | GGCAGCTCAGTTCTAGGAGC    |
| S100A7-F | GCACAAATTACCTCGCCGAT    |
| S100A7-R | TGGCTCTGCTTGTGGTAGTC    |
| S100A8-F | GTTTTTCAGGTGGGGCAAGTC   |
| S100A8-R | AGGACACTCGGTCTCTAGCA    |
| SPRR1A-F | TGCTCCGTATAACCAGCTTTCT  |
| SPRR1A-R | GGCTGGCAAGGTTGTTTCAC    |
| FLG-F    | TGAAGCCTATGACACCACTGA   |
| FLG-R    | TCCCCTACGCTTTCTTGTCTT   |
| IVL-F    | TCCTCCAGTCAATACCCATCAG  |
| IVL-R    | CAGCAGTCATGTGCTTTTCCT   |
| E2F1-F   | GCCATCCAGGAAAAGGTGTGA   |
| E2F1-R   | GTGATGTCATAGATGCGCCG    |
| E2F2-F   | GACAGGACTGAGGACAACCTG   |
| E2F2-R   | CCATGATGCTAGGGTCGGTG    |
| CDK1-F   | AAACTACAGGTCAAGTGGTAGCC |
| CDK1-R   | TCCTGCATAAGCACATCCTGA   |
| CCND1-F  | CAATGACCCCGCACGATTTC    |
| CCND1-R  | ATGAACTTCACATCTGTGGCA   |
| CCNB1-F  | AATAAGGCGAAGATCAACATGGC |

|          |                         |
|----------|-------------------------|
| CCNB1-R  | TTTGTTACCAATGTCCCCAAGAG |
| CENPA-F  | TTCCTCCCATCAACACAGTCG   |
| CENPA-R  | CACACCACGAGTGAATTTAACAC |
| CENPE-F  | GATGACCTAGCAACTACACAGTC |
| CENPE-R  | AAAGCACCCAAACTCGAATCA   |
| CENPF-F  | CTCTCCCGTCAACAGCGTTC    |
| CENPF-R  | GTTGTGCATATTCTTGGCTTGC  |
| FOXM1-F  | ATACGTGGATTGAGGACCACT   |
| FOXM1-R  | TCCAATGTCAAGTAGCGGTTG   |
| CCNA2-F  | CGCTGGCGGTACTGAAGTC     |
| CCNA2-R  | GAGGAACGGTGACATGCTCAT   |
| CDC6-F   | CCAGGCACAGGCTACAATCAG   |
| CDC6-R   | AACAGGTTACGGTTTGGACATT  |
| MALAT1-F | GCTCTGTGGTGTGGGATTGA    |
| MALAT1-R | GTGGCAAAATGGCGGACTTT    |
| XIST-F   | AGTGTACCTACCGCTTTGGC    |
| XIST-R   | TCCTCTGCCTGACCTGCTAT    |
| ACTB-F   | CATGTACGTTGCTATCCAGGC   |
| ACTB-R   | CTCCTTAATGTCACGCACGAT   |
| U6-F     | CGGCAGCACATATACTAAAA    |
| U6-R     | TATGGAACGCTTCACGAATT    |
| 18sRNA-F | GTAACCCGTTGAACCCATT     |
| 18sRNA-R | CCATCCAATCGGTAGTAGCG    |

B. Primer sequences used in *in vitro* transcription of SNHG8 isoforms or SNHG8 (T4) truncations

|                                    |                                           |
|------------------------------------|-------------------------------------------|
| T7-SNHG8(T1)-F                     | TAATACGACTCACTATAGGGGGAATAGCGTCATCAGTTCT  |
| T7-SNHG8(T2)-F                     | TAATACGACTCACTATAGGGGGCCTTTCACATTCGGGAA   |
| T7-SNHG8(T3)-F                     | TAATACGACTCACTATAGGGGGAATAGCGTCATCAGTTC   |
| T7-SNHG8(T4)-F                     | TAATACGACTCACTATAGGGGTGTCATGTGGCCATCTTGA  |
| T7-SNHG8(T5)-F                     | TAATACGACTCACTATAGGGCTTTCACATTCGGGAAGCG   |
| SNHG8-R                            | TAGCCACATGAATTAAGCATGGCCTTTCACATTCGGGAA   |
| T7-4'S1m/4'S1m-SNHG8-F             | TAATACGACTCACTATAGGGGGAATTCGTAGAAAATGCGGC |
| 4x S1m-R                           | TTCTAGACCAGCAGATGCGG                      |
| 4x S1m-SNHG8-Del 1-22/474-570-Xba1 | GCCGCATCTGCTGGTCTAGACTACTCTGTCGCTCTTGTGC  |
| 4x S1m-SNHG8-Del 1-22/474-570-Apa1 | CGGGTTTAAACGGGCCCTTCCAGGATATTATTCGGA      |
| 4x S1m-SNHG8-Del 317-480-Xba1-F    | GCCGCATCTGCTGGTCTAGAGTGTGCATGTGGCCATCTTG  |
| 4x S1m-SNHG8-Del 317-480-Apa1-R    | CGGGTTTAAACGGGCCCTGATAACTTCCAGGATATTA     |
| SNHG8-Del 78-220-F                 | TGAGCCAGATATTTAATTGG                      |
| SNHG8-Del 78-220-R                 | CCAATTAATATCTGGCTCA                       |
| SNHG8-Del 327-470-F                | TCAATGTTTCGAAGTTATCA                      |
| SNHG8-Del 327-470-R                | TGATAACTTCGAAACATTGA                      |
| SNHG8 Del 131-261-F                | TGGATTGTGAATACTGTAAAAAC                   |
| SNHG8 Del 131-261-R                | GTTTTTAAACAGTATTCACAATCCA                 |
| 4xS1m-Del 131-261-Apa1-R           | CGGGTTTAAACGGGCCGTTTTTAAACAGTATTCACAATCCA |
| 4xS1m-SNHG8-Xba1-F                 | GCCGCATCTGCTGGTCTAGAGTGTGCATGTGGCCATCTTG  |

|                                |                                              |
|--------------------------------|----------------------------------------------|
| 4xS1m-SNHG8-Apa1-R             | CGGGTTTAAACGGGCCCCGCCACATGAATTAAGCATTTTA     |
| T7-SNHG8-NB-F:                 | TAATACGACTCACTATAGGGCACATGAATTAAGCATTTTATTTA |
| T7-SNHG8-NB-R:                 | ACTATCAAGAAATCCAAGTGG                        |
| T7-SNORA24-NB-F:               | TAATACGACTCACTATAGGGGAATGTTACTTGTGCAAGTCA    |
| T7-SNORA24-NB-R:               | CTCCATGTATCTTTGGGACC                         |
| 4xS1m-SNHG8 Del 262-570-Apa1-R | CGGGTTTAAACGGGCCCCGAATGTTACTTGTGCAAGT        |

C. shRNA or SgRNA target sequences

|                |                          |
|----------------|--------------------------|
| shSNHG8#1      | TGGTAATGGGCGAAGTTTATT    |
| shSNHG8#2      | CAGTTTGGTTGCTGGTTAATT    |
| SgRNA1         | TCAGACGTGGACCATGTGCG     |
| SgRNA2         | TTTAGTGTACACGCTCATG      |
| genomicSNHG8-F | AATCCCCCTCGCTTTCGTGACC   |
| genomicSNHG8-R | TAAAAGAGTCTGCTGTCTCCCTTG |
| gH1.0          | CAAGTATTCAGACATGATCG     |
| gH1.2          | CCTGGTAAGCAAGGGAACGT     |
| gH1.3          | AGGCGGCCAAGCCTAAGTCG     |
| gH1.5          | CAAGGCAGTTAAGCCGAAGG     |

D. Primer sequences used in RIP constructs

|                       |                                              |
|-----------------------|----------------------------------------------|
| H1.0-BamHI-F (pQCXIN) | GATGATGACGATAAAGGATCCATGACCGAGAATTCCACGTCCG  |
| H1.0-EcoRI-R (pQCXIN) | GGGGGGGGGGGGCGGAATTCACCTTCTTCTTGCCGGCCCTC    |
| H1.2-BamHI-F (pQCXIN) | GATGATGACGATAAAGGATCCATGTCCGAGACTGCTCCTGC    |
| H1.2-EcoRI-R (pQCXIN) | GGGGGGGGGGGGCGGAATTCCTATTTCTTCTTGGGCGCCGCC   |
| H1.3-BamHI-F (pQCXIN) | GATGATGACGATAAAGGATCCCCAAGGCCAAAAGGCTGG      |
| H1.3-EcoRI-R (pQCXIN) | GGGGGGGGGGGGCGGAATTCCTCACTTTTCTTCTCGGAGCTGCC |
| H1.5-BamHI-F (pQCXIN) | GATGATGACGATAAAGGATCCATGTCCGAAACCGCTCCTGC    |
| H1.5-EcoRI-R (pQCXIN) | GGGGGGGGGGGGCGGAATTCCTACTTCTTTTGGCAGCCG      |

E. Primer sequences used in protein purification

|                                  |                                                                      |
|----------------------------------|----------------------------------------------------------------------|
| H1.3-BamHI-F (pGEX-6p)           | TTCCAGGGGGCCCCTGGGATCCCTCGGAGACTGCTCCACTTGC                          |
| H1.3-Xho1-R-6x-His (pGEX-6p)     | GTCACGATGCGGCCGCTCGAGttaGTGGTGGTGGTGGTGGTG<br>CTTTTCTTTCGGAGCTGCCTTC |
| H1.3-GD-BamHI-F (pGEX-6p)        | TTCCAGGGGGCCCCTGGGATCCCGACCCCAAGTATCTGAGCTT                          |
| H1.3-GD-Xho1-R-6x-His (pGEX-6p)  | GTCACGATGCGGCCGCTCGAGTTAGTGGTGGTGGTGGTGGTG<br>TTGCCTTCCCCGAAGCC      |
| H1.3-CTD-BamHI-F (pGEX-6p)       | TTCCAGGGGGCCCCTGGGATCCCCAAGGCCAAAAGGCTGG                             |
| H1.3-CTD-Xho1-R-6x-His (pGEX-6p) | GTCACGATGCGGCCGCTCGAGttaGTGGTGGTGGTGGTGGTG<br>CTTTTCTTTCGGAGCTGCCTTC |

F. sequences of ChIRP probes

|              |                      |
|--------------|----------------------|
| SNHG8-Probe1 | AGATGGTGAGTAATAACCTG |
| SNHG8-Probe2 | ACCTGTAGCAGTTTGGTTGC |
| SNHG8-Probe3 | GTTGCTGGTTAATTCTGGAT |
| SNHG8-Probe4 | TGGATTGTGAATCTCCATGT |
| SNHG8-Probe5 | CATTCAGTTAAAAACCTA   |

|               |                                                           |
|---------------|-----------------------------------------------------------|
| SNHG8-Probe6  | ACCTAGAGGGTGCCGGGTTA                                      |
| SNHG8-Probe7  | GGTTATTGGGCAAATTTCT                                       |
| SNHG8-Probe8  | TTTCTAAACCGTTGTTCAAT                                      |
| SNHG8-Probe9  | TCAATGTTTCTAGGAAGCTG                                      |
| SNHG8-Probe10 | AGATGGTGAGTAATAACCTGTAGCAGTTTGGTTGCTGGTTAATTC             |
| SNHG8-Probe11 | CATTCACTGTAAAAACCTAGAGGGTGCCGGGTATTGGGCAAATTTCTAAACCGTTGT |
| Lac Z-Probe1  | TAGCCAGCTTTCATCAACAT                                      |
| Lac Z-Probe2  | AGCAGCAGACCATTTTCAAT                                      |
| Lac Z-Probe3  | GTGTGGGCCATAATTCAATT                                      |
| Lac Z-Probe4  | CGGCAGCCGTTATTATTATT                                      |
| Lac Z-Probe5  | GAAACTGTTACCCGTAGGTA                                      |
| Lac Z-Probe6  | CACGGCGTTAAAGTTGTTCT                                      |
| Lac Z-Probe7  | GGATCGACAGATTTGATCCA                                      |
| Lac Z-Probe8  | GTAGTTCAGGCAGTTCAATC                                      |
| Lac Z-Probe9  | CAACGGTAATCGCCATTTGA                                      |
| Lac Z-Probe10 | TGCAAGGCGATTAAGTTGGG                                      |

G. sequences of RNA-FISH probes

|                    |                                                                               |
|--------------------|-------------------------------------------------------------------------------|
| SNHG8-FISH probe-1 | AATAATGAGTGGTAGACCGA                                                          |
| SNHG8-FISH probe-2 | GACGATGTCCAATAATGAGT                                                          |
| SNHG8-FISH probe-3 | TCTTAATTGGTCGTTGGTTT                                                          |
| SNHG8-FISH probe-4 | TCTATGTACCTCTAAGTGTTA                                                         |
| SNHG8-FISH probe-5 | TCTATGTACCTCTAAGTGTTAGGTCTTAATTGGTCGTTGGTTTGAC<br>GATGTCCAATAATGAGTGGTAGACCGA |
| SNHG8-FISH probe-6 | AGATCCAAAATTGTCA                                                              |
| SNHG8-FISH probe-7 | AACGGGTTATTGGGCCGTGG                                                          |
| SNHG8-FISH probe-8 | ACTTGTTGCCAAATCTTTAA                                                          |
| 18S-FISH probe-1   | ACCGTCCTAGTTGGTCCAT                                                           |
| 18S-FISH probe-2   | AGAAACTCTGTTTCGTATACG                                                         |
| 18S-FISH probe-3   | ACGCATGAGTCTGTACGTAC                                                          |
| 18S-FISH probe-4   | AGCGTCAAAGTGACATGGCC                                                          |
| 18S-FISH probe-5   | CTTGGTATTGACTAAATTAC                                                          |
| 18S-FISH probe-6   | CCTCTCCTCGCTCGCTGGTT                                                          |
| 18S-FISH probe-7   | CGAGATCTTAATGGTGTCAA                                                          |
| 18S-FISH probe-8   | CTAGACTATTTACGTGCGTA                                                          |
| 18S-FISH probe-9   | ATCCGTGCCGCTGATGGTAG                                                          |
| 18S-FISH probe-10  | AGTCCGAGGGAGAGGCCTTA                                                          |
| U6-FISH probe-1    | GAGGGGACGGTCCATTCATA                                                          |
| U6-FISH probe-2    | TGGTGGAAGCACTAGTACCA                                                          |
| U6-FISH probe-3    | CCTATTCGGAGCGGGACCCT                                                          |
| U6-FISH probe-4    | CCAGTCGTGTAGGCCTCACG                                                          |
| U6-FISH probe-5    | GGTGTAACCCCTTTAGCGT                                                           |
| U6-FISH probe-6    | GTGATGGTGTTTAATACGTC                                                          |
