# Supplementary material
Source: PubMed Central journal article supplement (PMC9345976)
Supplement: 41418_2022_944_MOESM18_ESM.pdf [file 41418_2022_944_MOESM18_ESM.pdf]

**Table S2. All reagents and antibodies used in this study**

| <b>REAGENT or RESOURCE</b>                           | <b>SOURCE</b>        | <b>IDENTIFIER</b> |
|------------------------------------------------------|----------------------|-------------------|
| <b>Reagents</b>                                      |                      |                   |
| TRIzol™ Reagent                                      | Thermo               | Cat# 15596026     |
| MMLV reverse transcription reagent                   | Promega              | Cat# M1705        |
| T7 RiboMAX™ Express LargeScale RNA Production System | Promega              | Cat# P1320        |
| Chemiluminescent Nucleic Acid Detection Module       | Thermo               | Cat# 89880        |
| TnT Quick Couple Transcription/Translation System    | Promega              | Cat#L1170         |
| NorthernMax®-Gly Kit                                 | Thermo               | Cat# AM1946       |
| Alexa Fluor 594 Nucleic Acid Labeling Kit            | Thermo               | Cat# U21654       |
| Alexa Fluor 680 Protein Labeling Labeling Kit        | Thermo               | Cat#A20172        |
| Biotin RNA Labeling Mix                              | Roche                | Cat#11685597910   |
| DIG RNA Labeling Mix                                 | Roche                | Cat# 11277073910  |
| Fluorescein-12-UTP Mix                               | Roche                | Cat# 11427857910  |
| TruePrep™ DNA Library Prep Kit V2 for Illumina       | Vazyme               | Cat# TD502        |
| Micrococcal Nuclease Solution                        | Thermo               | Cat# 88216        |
| <b>Recombinant DNA</b>                               |                      |                   |
| pLKO.1-puro vector                                   | Yongzhong Liu Lab    | N/A               |
| pLKO.1-puro-shSNHG8#1                                | This Paper           | N/A               |
| pLKO.1-puro-shSNHG8#2                                | This Paper           | N/A               |
| pLVX-puro vector                                     | Yongzhong Liu Lab    | N/A               |
| pLVX-puro-SNHG8(T4)                                  | This Paper           | N/A               |
| pcDNA3.1(+)                                          | Thermo               | Cat# V790-20      |
| pcDNA3.1(+)-SNHG8(T1)                                | This Paper           | N/A               |
| pcDNA3.1(+)-SNHG8(T2)                                | This Paper           | N/A               |
| pcDNA3.1(+)-SNHG8(T3)                                | This Paper           | N/A               |
| pcDNA3.1(+)-SNHG8(T4)                                | This Paper           | N/A               |
| pcDNA3.1(+)-SNHG8(T5)                                | This Paper           | N/A               |
| pcDNA3.1(+)-4× S1m                                   | This Paper           | N/A               |
| pcDNA3.1(+)-4× S1m-SNHG8Δ1-130                       | This Paper           | N/A               |
| pcDNA3.1(+)-4× S1m-SNHG8Δ131-261                     | This Paper           | N/A               |
| pcDNA3.1(+)-4×S1m-SNHG8Δ262-570                      | This Paper           | N/A               |
| pcDNA3.1(+)-4× S1m-SNHG8                             | This Paper           | N/A               |
| pcDNA3.1(+)-4× S1m-SNHG8Δ 1-22&474-570               | This Paper           | N/A               |
| pcDNA3.1(+)-4× S1m-SNHG8Δ78-220                      | This Paper           | N/A               |
| pcDNA3.1(+)-4× S1m-SNHG8Δ327-470                     | This Paper           | N/A               |
| pQCXIN-3×Flag-H1.0                                   | This Paper           | N/A               |
| pQCXIN-3×Flag-H1.2                                   | This Paper           | N/A               |
| pQCXIN-3×Flag-H1.3                                   | This Paper           | N/A               |
| pQCXIN-3×Flag-H1.5                                   | This Paper           | N/A               |
| pLVX-puro-H1.0CC                                     | This Paper           | N/A               |
| pLVX-puro-H1.1CC                                     | This Paper           | N/A               |
| pLVX-puro-H1.2CC                                     | This Paper           | N/A               |
| pLVX-puro-H1.3CC                                     | This Paper           | N/A               |
| pLVX-puro-H1.4CC                                     | This Paper           | N/A               |
| pLVX-puro-H1.5CC                                     | This Paper           | N/A               |
| lentiCRISPRv2-ΔH1.0                                  | This Paper           | N/A               |
| lentiCRISPRv2-ΔH1.2                                  | This Paper           | N/A               |
| lentiCRISPRv2-ΔH1.3                                  | This Paper           | N/A               |
| lentiCRISPRv2-ΔH1.5                                  | This Paper           | N/A               |
| 12×p601 arrays                                       | Robert G. Roeder Lab | N/A               |

|                                           |                               |                                                                                                                                 |
|-------------------------------------------|-------------------------------|---------------------------------------------------------------------------------------------------------------------------------|
| pGEX-6p-1                                 | Ming Lei Lab                  | N/A                                                                                                                             |
| pGEX-6p-H1.3-6×His                        | This Paper                    | N/A                                                                                                                             |
| pGEX-6p-H1.3-GD-6×His                     | This Paper                    | N/A                                                                                                                             |
| pGEX-6p-H1.3-CTD-6×His                    | This Paper                    | N/A                                                                                                                             |
| <b>Antibodies</b>                         |                               |                                                                                                                                 |
| anti-SOX9                                 | Abcam                         | Cat# ab185230                                                                                                                   |
| anti-MAFB                                 | Abcam                         | Cat# ab66506                                                                                                                    |
| anti-KRT13                                | Abcam                         | Cat# ab92551                                                                                                                    |
| anti-E2F1                                 | Abcam                         | Cat# ab112580                                                                                                                   |
| anti-EZH2                                 | Abcam                         | Cat# ab186006                                                                                                                   |
| anti-CDK1                                 | Proteintech                   | Cat# 19532-1-AP                                                                                                                 |
| anti-CCNA2                                | Proteintech                   | Cat# 18202-1-AP                                                                                                                 |
| anti-biotin                               | Thermo                        | Cat# 89880D                                                                                                                     |
| anti-β-actin                              | Abcam                         | Cat# ab20272                                                                                                                    |
| anti-H1.0                                 | Abcam                         | Cat# ab11079                                                                                                                    |
| anti-H1.2                                 | Abcam                         | Cat# ab4086                                                                                                                     |
| anti-H1.3                                 | Abcam                         | Cat# ab183737                                                                                                                   |
| anti-H1.5                                 | Abcam                         | Cat# ab18208                                                                                                                    |
| anti-HP1BP3                               | Abcam                         | Cat# ab98894                                                                                                                    |
| anti-HP1α                                 | Abcam                         | Cat# ab109028                                                                                                                   |
| anti-Flag                                 | Sigma                         | Cat# F3165                                                                                                                      |
| anti-Flag-HRP                             | Sigma                         | Cat# F8592                                                                                                                      |
| anti-pan H1                               | proteintech                   | Cat# D209-3                                                                                                                     |
| <b>Bacterial and Virus Strains</b>        |                               |                                                                                                                                 |
| DH5α competent <i>E.coli</i>              | TIANGEN                       | Cat# CB101                                                                                                                      |
| Rosetta2 (DE3)                            | TSINGKE                       | Cat#TSC04                                                                                                                       |
| <b>Software and Algorithms</b>            |                               |                                                                                                                                 |
| GraphPad Prism, Version 7.0.0 for windows | N/A                           | <a href="https://www.graphpad.com">https://www.graphpad.com</a>                                                                 |
| The Gene Ontology Resource                | N/A                           | <a href="http://geneontology.org">http://geneontology.org</a>                                                                   |
| GSEA, Version 4.0.3                       | BROAD INSTITUTE               | N/A                                                                                                                             |
| Image J                                   | NIH, USA                      | <a href="https://imagej.nih.gov/ij">https://imagej.nih.gov/ij</a>                                                               |
| Bowtie 2                                  | (Langmead and Salzberg, 2012) | <a href="http://bowtie-bio.sourceforge.net/bowtie2/index.shtml">http://bowtie-bio.sourceforge.net/bowtie2/index.shtml</a>       |
| MACS, Version 2.1.0                       | (Zhang et al., 2008)          | <a href="https://github.com/taoliu/MACS">https://github.com/taoliu/MACS</a>                                                     |
| BEDTools                                  | (Quinlan, 2014)               | <a href="https://bedtools.readthedocs.io/en/latest">https://bedtools.readthedocs.io/en/latest</a>                               |
| Samtools                                  | (Li et al., 2009)             | <a href="http://samtools.sourceforge.net">http://samtools.sourceforge.net</a>                                                   |
| Fast QC, Version 0.11.3                   | (Brown et al., 2017)          | <a href="http://www.bioinformatics.babraham.ac.uk/projects/fastqc">http://www.bioinformatics.babraham.ac.uk/projects/fastqc</a> |
